# Supplementary material
Source: PubMed Central journal article supplement (PMC4135677)
Supplement: JB.01693-14_zjb999093239so2.pdf [file JB.01693-14_zjb999093239so2.pdf]

**Supplemental Table 1. Oligonucleotides used in this study.**

| <b>Primer Name</b> | <b>Sequence (5'- 3')</b>                                                                 | <b>Target</b>               |
|--------------------|------------------------------------------------------------------------------------------|-----------------------------|
| oVCU151            | GCAACACCATAGCAGCCTGATTCACC                                                               | <i>tbpB</i> upstream region |
| oVCU153            | GCGGGAGAGAGTTAGAGAGAGGGCAACAAG                                                           | <i>tbpB</i> upstream region |
| oVCU256            | GGATCCATTTTTTAAAAATAAAATAAAATAATAAT<br>CCTTATCATTCTTTAATTGAATCGGGTTTGTTATG               | -35 region                  |
| oVCU257            | GGATCCATGCTTTTTTATATTTTTAGTAAATAAAC<br>CAAATACCGTCATTCCCGCGCTG                           | -35 region                  |
| oVCU258            | CCCGGGAATAATCCTTATCATTCTTTAATTGAATC<br>GGGTTTGTTATGAACAATCC                              | -10 region                  |
| oVCU259            | CCCGGGTTTATTTTTAAAAAATTTGCAAATGCTTT<br>TTTATATTTTTAGTAAATAAACCAAATACCGTCA<br>TTCCC       | -10 region                  |
| oVCU260            | CCCGGGCCTTATCATTCTTTAATTGAATCGGGTTT<br>GTTATGAACAATCCATTGGTG                             | Fur box                     |
| oVCU261            | CCCGGGATTTTATTTATTTTTAAAAAATTTGCAAA<br>TGCTTTTTTATATTTTTAGTAAATAAACCAAATA<br>CCGTCATTCCC | Fur box                     |

**Quantitative Real Time RT-PCR**

|             |                      |               |
|-------------|----------------------|---------------|
| oVCU562 (F) | TTTTACGACGAGACGCACAC | <i>tbpA</i>   |
| oVCU563 (R) | CATAATCCGCCCAAGTGTCT |               |
| oVCU564 (F) | GACGGCAAGGAAATCAAAAA | <i>tbpB</i>   |
| oVCU565 (R) | TTTATCTGCCTGACCGTTCC |               |
| oVCU566 (F) | TCCTTCATCGGTTTGAAAGG | <i>porBIA</i> |
| oVCU567 (R) | AGCTTTTACCCTCCCAAGGA |               |

### **Relative RT-PCR**

|              |                                |              |
|--------------|--------------------------------|--------------|
| oVCU199C (F) | CTTGCGGCTTACTGCCCTCTCTCTAGCTTT | upstream RNA |
| oVCU735C (R) | TTGCCGCAACTCGGAGAATGCCCTCTCCCC |              |
| oVCU110 (F)  | TATCGGAACGTACCGGGTAGC          | 16S rRNA     |
| oVCU111 (R)  | GTAATTACCGCGGCTGCTGGCA         |              |
| oVCU186 (F)  | CGGCGAAGACAAACGTCAAACGGTTTCCAC | <i>tbpA</i>  |
| oVCU187 (R)  | GACGGCAATATTTGTCCGAACCGTCGGCGG |              |
